# Supplementary material
Source: PubMed Central journal article supplement (PMC2488215)
Supplement: en.2007-1807_1.pdf [file en.2007-1807_1.pdf]

**Table 1.** Sequence and annealing temperature of primer/probe sets used for semi-quantitative RT-PCR.

| Gene        | Primers and probe sequence (5' - 3')                                                            | T <sub>m</sub> (°C) | Product size (bp) |
|-------------|-------------------------------------------------------------------------------------------------|---------------------|-------------------|
| LHβ         | ACTGTCCTAGCATGGTCCGAGTAC<br>GAACGCAAGCTCCCGGTAG<br>[6-FAM]CTCCTGTGCCTCAGCCAGTGTGCA[BHQ1-Q]      | 60                  | NA                |
| FSHβ        | TTCAAGGAGCTGGTATACGAGACC<br>TGGCTACTGGATATGTGTAGAGGGA<br>[6-FAM]TAAGATTGCCTGGCTGTGCCCGC[BHQ1-Q] | 60                  | NA                |
| RPL19       | CAACTCCCGTCAGCAGATCAG<br>TACCCTTCCTCTTCCCTATGCC<br>[6-FAM]TGACTGTCCATTCCCGGGCTCG[BHQ1-Q]        | 60                  | NA                |
| Prolactin   | CAATCTGTTCCGCTGGTGACT<br>AGGCCTGGCTAATTATCTTCTC                                                 | 55                  | 411               |
| αGSU        | TTGCCCAGAATGTAAACTAAAG<br>GTGGCACGCCGTATGATTCT                                                  | 60                  | 232               |
| Inhibin-α   | CTCCAGGCTATCCTTTTCC<br>TGGCCGGAATACATAAGTGA                                                     | 58                  | 112               |
| ActivinβB   | TCCGCCTGTACTTCTTCGTCTCTA<br>GGTCCGCCCATCACACTCTA                                                | 60                  | 431               |
| ActivinβA   | GATCATCACCTTTGCCGAGT<br>TGGTCCTGGTTCTGTTAGCC                                                    | 58                  | 143               |
| Follistatin | ACCAGGGCAAATGTAAAAAGAC<br>ACTCGCTGGCGTATGTGG                                                    | 60                  | 402               |
| RPL19       | GCCAATGCCAACTCCCGTCAG<br>CGCTTTCGTGCTTCCCTTGGTCTTA                                              | 60                  | 419               |
